# Supplementary material for: Assisting Towards a Healthy Diet for the Most Deprived in Post-Crisis Greece: An Evaluation of the State Food Provision Program
Source: Preprints.org preprint supplement (doi:10.20944/preprints202011.0481.v1), 2020-11-18

APPENDIX

**Figure 1:** Average percentage of the daily contribution towards achieving the recommended intake per food group for each of the social partnership

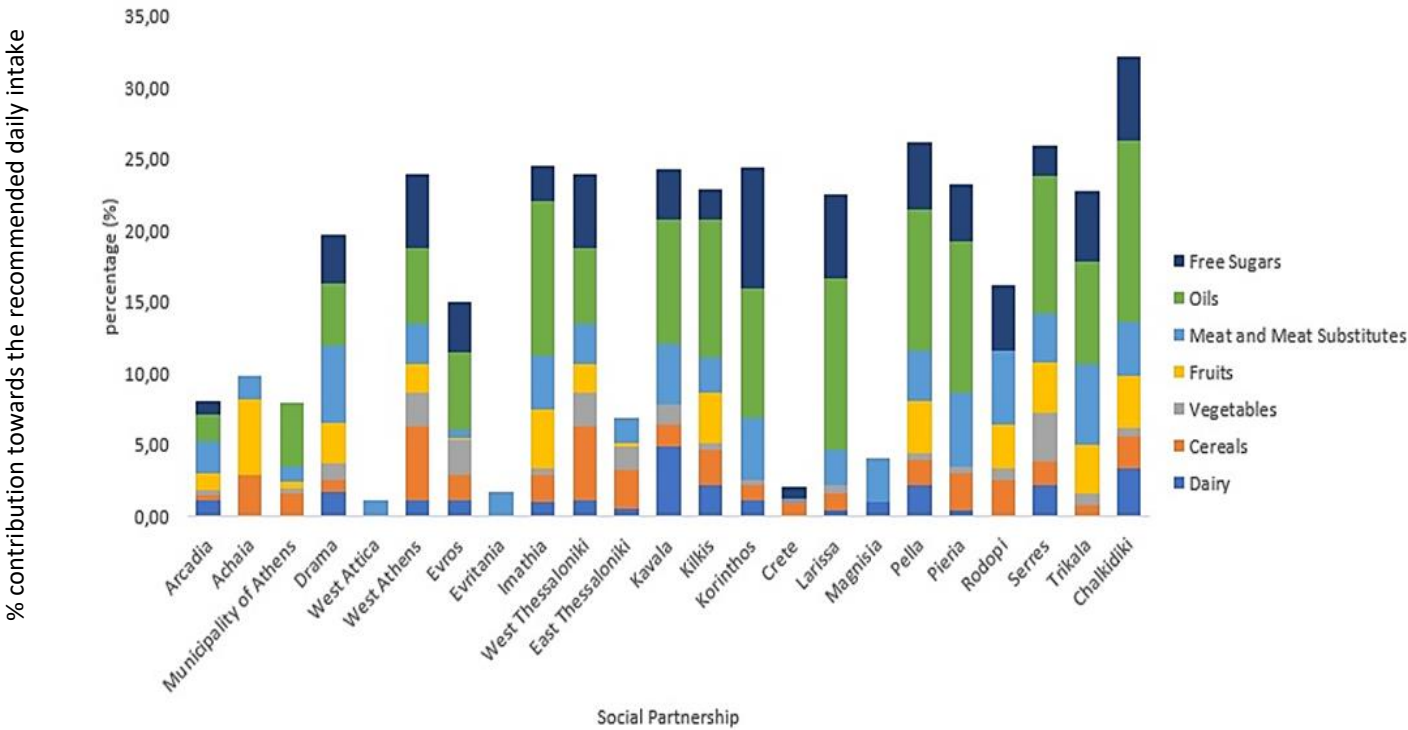

Supplement: Supplementary file 1 [file supplementary]
