# Supplementary material for: Assisting Towards a Healthy Diet for the Most Deprived in Post-Crisis Greece: An Evaluation of the State Food Provision Program
Source: Preprints.org preprint supplement (doi:10.20944/preprints202011.0481.v1), 2020-11-18
Supplement: Supplementary file 1 [file Vlassopoulos FEAD Appendix Table 1 (2).docx]

**APPENDIX**

**Table 1**: Percentage of the daily coverage per food group and person depending on the number of members in an application (Centralized Supplies)

|  | **Percentage of the Daily Recommended intake covered per food group per person** | | | | | | |
| --- | --- | --- | --- | --- | --- | --- | --- |
| **Number of members per application** | **Fruits (%)** | **Vegetables (%)** | **Cereals (%)** | **Dairy (%)** | **Meat and Substitutes (%)** | **Oils (%)** | **Free Sugars (%)** |
| **1** | 16,44 | 6,03 | 4,57 | 3,04 | 13,70 | 34,25 | 16,44 |
| **2** | 12,33 | 3,01 | 4,57 | 3,04 | 8,99 | 17,12 | 8,22 |
| **3** | 10,96 | 2,01 | 3,04 | 2,91 | 6,85 | 11,42 | 5,48 |
| **4** | 10,27 | 1,51 | 2,28 | 2,84 | 5,78 | 8,56 | 4,11 |
| **5** | 9,86 | 1,21 | 1,83 | 2,80 | 5,14 | 6,85 | 3,29 |
| **6** | 9,59 | 1,00 | 1,52 | 2,77 | 4,71 | 5,71 | 2,74 |
| **7** | 9,39 | 0,86 | 1,30 | 2,75 | 4,40 | 4,89 | 2,35 |
| **8** | 9,25 | 0,75 | 1,14 | 2,73 | 4,17 | 4,28 | 2,05 |
| **9** | 9,13 | 0,67 | 1,01 | 2,72 | 4,00 | 3,81 | 1,83 |
| **10** | 9,04 | 0,60 | 0,91 | 2,71 | 3,85 | 3,42 | 1,64 |
| **11** | 8,97 | 0,55 | 0,83 | 2,71 | 3,74 | 3,11 | 1,49 |
