# Supplementary material for: Assisting Towards a Healthy Diet for the Most Deprived in Post-Crisis Greece: An Evaluation of the State Food Provision Program
Source: Preprints.org preprint supplement (doi:10.20944/preprints202011.0481.v1), 2020-11-18
Supplement: Supplementary file 2 [file supplementary]

Archive with 3 entries (2 files):
- Supplement/
- Supplement/Vlassopoulos FEAD Appendix Table 1 (2).docx
- Supplement/Vlassopoulos FEAD Supplement Fig 1.pdf
